# Supplementary material for: Sex- and age-related morphological and functional differences in the skull of Eira barbara (Linnaeus, 1758) (Carnivora, Mustelidae)
Source: PeerJ. 2025 Jul 15;13:e19730. doi: 10.7717/peerj.19730 (PMC12273703; doi:10.7717/peerj.19730)
Supplement: Supplemental Information 1 [file peerj-13-19730-s001.xlsx]

## Sheet: Plan1
Perini & Sicuro, Sex- and age-related morphological and functional differences in the skull of Eira barbara (Linnaeus, 1758) (Carnivora, Mustelidae)
Supplemental Table 1 - List of specimens of Eira barbara (Linnaeus 1758) analyzed
Institution	N°	Country	Locality	Sex	Age Class
AMNH	389	Brazil	Mato Grosso, Chapada dos Guimarães	M	IV
AMNH	5937	Trinidad and Tobago	Trinidad, Caroni County	F	IV
AMNH	16938	Venezuela	Bolívar, Cedeño	M	IV
AMNH	17254	Mexico	Veracruz-Llave, Paso Nuevo	F	IV
AMNH	17554	Venezuela	Bolívar, Sucre	F	IV
AMNH	21543	Costa Rica	Alajuela, Naranjo	M	IV
AMNH	24443	Costa Rica	Limón, Talamanca	F	IV
AMNH	30202	Venezuela	Bolívar, Cedeño	F	IV
AMNH	31445	Venezuela	Lara, Morán	M	IV
AMNH	32065	Venezuela	Yaracuy, Bolívar	M	IV
AMNH	32669	Colombia	Magdalena, Santa Marta	F	IV
AMNH	35943	Venezuela	Sucre, Arismendi	F	IV
AMNH	37366	Colombia	Meta, Cabuyaro	M	IV
AMNH	38096	Panama	Darién, Tapaliza River	F	IV
AMNH	41941	Guyana	Cuyuni-Mazaruni, Bartica	?	IV
AMNH	42329	Guyana	Cuyuni-Mazaruni, Bartica	F	IV
AMNH	42856	Guyana	Cuyuni-Mazaruni, Bartica	F	III
AMNH	46523	Ecuador	Pichincha, Quito	F	IV
AMNH	48179	Guyana	Cuyuni-Mazaruni, Bartica	F	IV
AMNH	61432	Ecuador	Loja, Puyango	F	IV
AMNH	61433	Ecuador	El Oro, Piñas	M	IV
AMNH	61434	Ecuador	Loja, Puyango	F	III
AMNH	62094	Ecuador	Chimborazo, Chunchi	F	IV
AMNH	64005	Ecuador	Orellana, Loreto	M	II
AMNH	69193	Colombia	Cundinamarca, Medina	?	II
AMNH	71850	Peru	Loreto, Maynas	F	IV
AMNH	71851	Peru	Loreto, Maynas	F	IV
AMNH	71852	Peru	Loreto, Maynas	F	IV
AMNH	74116	Peru	Loreto, Maynas	M	I
AMNH	74416	Peru	Loreto, Maynas	M	IV
AMNH	74417	Peru	Loreto, Maynas	F	IV
AMNH	74418	Peru	Loreto, Maynas	M	IV
AMNH	76032	Peru	Loreto, Requena	M	IV
AMNH	76033	Peru	Ucayali, Atalaya	M	III
AMNH	76034	Peru	Loreto, Requena	M	IV
AMNH	76489	Peru	Loreto, Ucayali	M	II
AMNH	76490	Peru	Loreto, Ucayali	F	IV
AMNH	76491	Peru	Loreto, Ucayali	F	II
AMNH	76637	Peru	Loreto, Requena	F	IV
AMNH	76747	Colombia	Cundinamarca, Medina	F	IV
AMNH	76748	Colombia	Cundinamarca, Medina	M	I
AMNH	76809	Peru	Loreto, Requena	M	IV
AMNH	76857	Venezuela	Amazonas, Atabapo	M	IV
AMNH	78509	Venezuela	Amazonas, Atabapo	F	IV
AMNH	79369	Guatemala	Alta Verapaz, Cobán	F	IV
AMNH	79370	Guatemala	Escuintla, La Democracia	M	IV
AMNH	95374	Brazil	Pará, Limoal	F	IV
AMNH	95843	Brazil	Pará, Porto de Moz	F	III
AMNH	98580	Peru	Huánuco, Pachitea	M	IV
AMNH	98583	Peru	Loreto, Alto Amazonas	M	I
AMNH	98584	Peru	Loreto, Alto Amazonas	F	II
AMNH	98586	Peru	Loreto, Maynas	M	II
AMNH	98587	Peru	San Martín, Mariscal Cáceres	F	I
AMNH	123271	Honduras	Francisco Morazán, Tegucigalpa	F	IV
AMNH	128127	Honduras	Olancho, Catacamas	M	IV
AMNH	133953	Brazil	Pará, Aveiro	?	IV
AMNH	136282	Colombia	Meta, Villavicencio	F	IV
AMNH	136287	Colombia	Meta, Villavicencio	F	I
AMNH	136288	Colombia	-	?	IV
AMNH	143001	Venezuela	Caracas, Antímano	M	IV
AMNH	145949	Mexico	Oaxaca, Tehuantepec	F	IV
AMNH	182953	Ecuador	Pastaza, Conambo River	M	I
AMNH	230838	Peru	Pasco, Oxapampa	F	IV
AMNH	230839	Peru	Pasco, Oxapampa	F	IV
AMNH	40985	Ecuador	-	?	I
AMNH	71116	Guatemala	Suchitepequez, Mazatenango	F	IV
AMNH	77712	Venezuela	Bolívar, Cedeño	M	I
AMNH	24444	Costa Rica	Limón, Talamanca	M	IV
FMNH	13237	Colombia	Magdalena, Minca	?	IV
FMNH	13238	Colombia	Magdalena, Don Diego	?	IV
FMNH	15986	Guatemala	Izabal, Los Amates	M	III
FMNH	18763	Venezuela	Zulia, Maracaibo	M	IV
FMNH	20200	Venezuela	Mérida, La Carbonera	M	III
FMNH	21379	Bolivia	Santa Cruz, Ichilo	M	IV
FMNH	21380	Bolivia	Santa Cruz, Ichilo	M	IV
FMNH	21381	Bolivia	Santa Cruz, Ichilo	F	IV
FMNH	22424	Brazil	Santa Catarina	?	IV
FMNH	22467	Bolivia	Santa Cruz, Ichilo	F	IV
FMNH	28337	Brazil	Mato Grosso, Descalvado	?	I
FMNH	28338	Brazil	Mato Grosso, Descalvado	?	I
FMNH	30273	Argentina	Misiones, Monte Carlo	?	I
FMNH	30355	Bolivia	Santa Cruz, Chiguitos	?	IV
FMNH	34327	Brazil	Pará	M	IV
FMNH	35693	Brazil	Pará	?	IV
FMNH	41212	Peru	Huánuco, Leoncio Prado	M	II
FMNH	41213	Peru	Huánuco, Leoncio Prado	?	IV
FMNH	41214	Peru	Huánuco, Leoncio Prado	?	IV
FMNH	41215	Peru	Huánuco, Leoncio Prado	?	IV
FMNH	41607	Guatemala	Escuintla, Tiquisate	F	IV
FMNH	41608	Guatemala	Escuintla, Tiquisate	M	II
FMNH	44332	Ecuador	Esmeraldas, Rosa Zárate	M	IV
FMNH	46221	Guyana	Demerara-Berbice, Rockstone	M	IV
FMNH	47406	Brazil	Paraná, Prado Ferreira	M	IV
FMNH	51873	Bolivia	Santa Cruz, Ichilo	M	IV
FMNH	61873	Trinidad and Tobago	Trinidad, Saint Andrew	F	IV
FMNH	62076	Peru	Ucayali, Coronel Portillo	F	III
FMNH	63901	Belize	Toledo	M	I
FMNH	65794	Peru	Junín, Chanchamayo	F	IV
FMNH	65795	Peru	Junín, Chanchamayo	M	IV
FMNH	66427	Peru	Cusco, Quispicanchi	M	IV
FMNH	66428	Peru	Cusco, Quispicanchi	M	IV
FMNH	66969	Mexico	Chiapas, Palenque	F	IV
FMNH	66970	Mexico	Chiapas, Palenque	F	?
FMNH	68896	Colombia	Córdoba, El Socorro	M	I
FMNH	68897	Colombia	Córdoba, El Socorro	M	III
FMNH	68898	Colombia	Córdoba, El Socorro	F	IV
FMNH	68899	Colombia	Córdoba, El Socorro	M	IV
FMNH	68900	Colombia	Sucre, Colosó	M	IV
FMNH	68901	Colombia	Córdoba, Jac Catival	M	IV
FMNH	68902	Colombia	Córdoba, Jac Catival	F	IV
FMNH	68903	Colombia	Córdoba, Jac Catival	F	II
FMNH	69583	Colombia	Chocó, Unguía	F	III
FMNH	69584	Colombia	Chocó, Unguía	F	IV
FMNH	69585	Colombia	Chocó, Unguía	M	IV
FMNH	69586	Colombia	Chocó, Unguía	M	IV
FMNH	70762	Colombia	Caquetá, Quebrada La Tagua	M	I
FMNH	70763	Colombia	Caquetá, Quebrada La Tagua	F	I
FMNH	70764	Colombia	Caquetá, Quebrada La Tagua	M	III
FMNH	70765	Colombia	Cundinamarca, Guasca	F	IV
FMNH	70766	Colombia	Cundinamarca, Guasca	F	II
FMNH	70767	Colombia	Cundinamarca, Guasca	M	II
FMNH	78669	Peru	Cusco, Quispicanchi	F	IV
FMNH	78670	Peru	Cusco, Quispicanchi	F	IV
FMNH	85819	Colombia	Meta, Villavicencio	M	IV
FMNH	86914	Peru	Loreto, Loreto	M	III
FMNH	87862	Colombia	Meta, Villavicencio	F	IV
FMNH	87863	Colombia	Meta, Villavicencio	F	IV
FMNH	88882	Peru	Loreto, Alto Amazonas	M	IV
FMNH	88883	Peru	Loreto, Alto Amazonas	M	IV
FMNH	88884	Peru	Loreto, Alto Amazonas	M	IV
FMNH	88885	Peru	Loreto, Alto Amazonas	F	IV
FMNH	90020	Peru	Madre de Dios, Tambopata	M	I
FMNH	90053	Colombia	Cauca, Puerto Saija	F	IV
FMNH	90054	Colombia	Cauca, Guachicono	M	IV
FMNH	92367	Colombia	Arauca, Arauca	F	IV
FMNH	93173	Suriname	Nickerie	F	III
FMNH	94312	Brazil	São Paulo, Ribeirão Fundo	F	IV
FMNH	94313	Brazil	São Paulo, Ribeirão Fundo	F	IV
FMNH	94314	Brazil	São Paulo, Ribeirão Fundo	M	III
FMNH	94315	Brazil	São Paulo, Ribeirão Fundo	M	IV
FMNH	95011	Ecuador	Pichincha, Gualea	M	I
FMNH	95520	Suriname	Brokopondo	F	II
FMNH	95521	Suriname	Marowijne	M	IV
MCN	3823	Brazil	Minas Gerais, Conceição do Mato Dentro	F	III
MCN	3701	Brazil	Minas Gerais, Conceição do Mato Dentro	M	IV
MCN	2981	Brazil	Minas Gerais, Catas Altas	F	II
MCN	1915	Brazil	Minas Gerais, Belo Vale	M	IV
MCN	1746	Brazil	Minas Gerais, Boa Esperança	?	IV
MCN	3012	Brazil	Minas Gerais, Catas Altas	M	III
MCN	1898	Brazil	Minas Gerais, Cristália	F	IV
MN	68625	Brazil	Amazonas, Marari	F	IV
MN	6089	Brazil	Amazonas, Itacoatiara	F	IV
MN	29976	Brazil	Pará, Cumaru	M	IV
MN	6088	Brazil	Amazonas, Itacoatiara	F	IV
MN	6085	Brazil	Amazonas, Itacoatiara	M	IV
MN	3126	Brazil	Maranhão, Humberto de Campos	?	I
MN	10990	Brazil	-	M	IV
MN	5619	Brazil	Espírito Santo, Santa Teresa	M	I
MN	63452	Brazil	Piauí, São Raimundo Nonato	?	III
MN	51650	Brazil	Bahia, Maurícia	?	IV
MN	25686	Brazil	Rio de Janeiro, Mambucaba	?	IV
MN	7309	Brazil	Rio de Janeiro, Iguaçu Velho	?	IV
MN	5649	Brazil	Rio de Janeiro, Paraty	M	IV
MN	3106	Brazil	Rio de Janeiro, Teresópolis	?	IV
MN	74385	Brazil	Rio de Janeiro, Resende	?	I
MN	91048	Brazil	Rio de Janeiro, Rio de Janeiro	M	IV
MN	91151	Brazil	Rio de Janeiro, Petrópolis	?	IV
MN	7611	Brazil	Minas Gerais, Volta Grande	F	IV
MN	29977	Brazil	Minas Gerais, Além Paraíba	F	II
MN	5512	Brazil	Minas Gerais, Além Paraíba	F	IV
MN	68357	Brazil	Paraná, Telêmeco Borba	M	IV
MN	68358	Brazil	Paraná, Telêmeco Borba	F	IV
MN	68365	Brazil	Paraná, Telêmeco Borba	?	IV
MN	89822	Brazil	São Paulo, Serra da Bocaína	?	IV
MN	79526	Brazil	Minas Gerais, Simão Pereira	F	IV
MN	82100	Brazil	Minas Gerais, Simão Pereira	M	IV
MN	75096	Brazil	Tocantins, Muricilândia	M	IV
MN	4906	Brazil	Goiás, Pirenopólis	F	III
MN	4904	Brazil	Goiás, Pirenopólis	M	III
MN	4907	Brazil	Goiás, Anápolis	F	III
MN	89884	Brazil	Mato Grosso do Sul, Pantanal	?	IV
MN	5163	Brazil	Mato Grosso do Sul, Maracaju	M	I
MNHN	1911-632	Argentina	-	?	IV
MNHN	1936-1446	Ecuador	-	?	IV
MNHN	1921-57	Colombia	-	?	III
MNHN	1929-600	Colombia	Cundinamarca, Medina	M	IV
MNHN	1949-138	Brazil	São Paulo	?	IV
MNHN	1962-2087	Venezuela	-	?	IV
MNHN	1962-2084	French Guiana	Cayenne	?	IV
MNHN	1956-1389	French Guiana	Cayenne	F	IV
MNHN	1981-142	French Guiana	Maripasoula	F	IV
MNHN	1981-141	French Guiana	Saül	F	IV
MNHN	1998-2256	French Guiana	Petit-Saut	M	IV
MNHN	1998-237	French Guiana	Mana	F	IV
MNHN	1998-1854	French Guiana	Petit-Saut	F	IV
MNHN	2000-646	French Guiana	Petit-Saut	M	IV
MNHN	1999-1074	French Guiana	Petit-Saut	M	IV
MNHN	1984-1177	French Guiana	Saül	?	IV
MZUSP	19802	Brazil	Amazonas, Urucurituba	F	IV
MZUSP	19809	Brazil	Pará, Fordlândia	F	III
MZUSP	19810	Brazil	Pará, Fordlândia	M	IV
MZUSP	19803	Brazil	Pará, Fordlândia	F	IV
MZUSP	19804	Brazil	Pará, Fordlândia	M	IV
MZUSP	19805	Brazil	Pará, Fordlândia	F	II
MZUSP	5194	Brazil	Amazonas, Lago Batista	F	IV
MZUSP	5193	Brazil	Amazonas, Igarapé Grande	M	II
MZUSP	5185	Brazil	Amazonas, Lago Batista	M	II
MZUSP	5191	Brazil	Amazonas, Santa Cruz	M	III
MZUSP	5192	Brazil	Amazonas, Santa Cruz	F	IV
MZUSP	20068	Brazil	Rondônia, Ji-Paraná	M	I
MZUSP	5140	Brazil	Amazonas, Santa Cruz	F	IV
MZUSP	926	Brazil	Amazonas, Rio Juruá	F	IV
MZUSP	5189	Brazil	Amazonas, Lago Batista	M	IV
MZUSP	19845	Brazil	Pará, Caxiricatuba	F	IV
MZUSP	19807	Brazil	Amazonas, Urucurituba	M	IV
MZUSP	19797	Brazil	Amazonas, Santa Cruz	F	IV
MZUSP	19806	Brazil	Pará, Fordlândia	F	III
MZUSP	19798	Brazil	Pará, Fordlândia	M	II
MZUSP	19799	Brazil	Pará, Tauari	F	III
MZUSP	19800	Brazil	Pará, Fordlândia	F	IV
MZUSP	10145	Brazil	Pará, Fordlândia	F	IV
MZUSP	10144	Brazil	Pará, Fordlândia	M	III
MZUSP	10143	Brazil	Pará, Fordlândia	F	IV
MZUSP	5186	Brazil	Pará, Santa Maria do Boiaçu	F	IV
MZUSP	5195	Brazil	Pará, Santa Maria do Boiaçu	F	IV
MZUSP	3672	Brazil	Pará, Óbidos	F	IV
MZUSP	5188	Brazil	Amazonas, Lago Batista	F	IV
MZUSP	5187	Brazil	Pará, Caxiricatuba	M	IV
MZUSP	5275	Brazil	Pará, Caxiricatuba	M	III
MZUSP	4244	Brazil	Goiás, Cana Brava	F	IV
MZUSP	4243	Brazil	Goiás, Cana Brava	F	IV
MZUSP	3826	Brazil	Goiás, Pilar	?	IV
MZUSP	4242	Brazil	Goiás, Barra do Rio São Domingos	F	IV
MZUSP	19814	Brazil	Goiás, Cana Brava	?	IV
MZUSP	6316	Brazil	Mato Grosso, Aricá	M	II
MZUSP	4294	Brazil	Mato Grosso do Sul, Salobra	M	IV
MZUSP	5855	Brazil	Mato Grosso do Sul, Salobra	?	IV
MZUSP	7029	Brazil	Mato Grosso, Dumbá	M	IV
MZUSP	20056	Brazil	Rondônia, Ji-Paraná	M	I
MZUSP	3375	Brazil	Mato Grosso do Sul, Corumbá	M	IV
MZUSP	2653	Brazil	Bahia, Senhor do Bonfim	M	II
MZUSP	22901	Brazil	Rondônia, Pedra Branca	M	III
MZUSP	19818	Brazil	São Paulo, Boracéia	?	I
MZUSP	6811	Brazil	São Paulo, Boracéia	F	IV
MZUSP	7699	Brazil	São Paulo, São Carlos	F	IV
MZUSP	19817	Brazil	São Paulo, Porto Estrada	F	IV
MZUSP	1438	Brazil	Rio Grande do Sul, São Lourenço	?	IV
MZUSP	3184	Brazil	Rio Grande do Sul, Pinambi	M	IV
MZUSP	1087	Brazil	Rio Grande do Sul, São Lourenço	?	IV
MZUSP	114	Brazil	Rio Grande do Sul, São Lourenço	?	IV
MZUSP	2976	Brazil	São Paulo, Ituverava	M	IV
MZUSP	3760	Brazil	São Paulo, Terra Indígena Vanuire	M	IV
MZUSP	2975	Brazil	São Paulo, Ituverava	M	IV
MZUSP	2848	Brazil	São Paulo, Bauru	M	II
MZUSP	2972	Brazil	São Paulo, Ituverava	M	IV
MZUSP	2924	Brazil	São Paulo, Franca	F	III
MZUSP	2974	Brazil	São Paulo, Ituverava	M	IV
MZUSP	1162	Brazil	São Paulo, Itararé	F	III
MZUSP	2726	Brazil	Minas Gerais, Mairinque	F	IV
MZUSP	2727	Brazil	Minas Gerais, Teófilo Otoni	M	IV
MZUSP	5933	Brazil	Minas Gerais, Baixo Rio Suaçuí	F	IV
MZUSP	2728	Brazil	Minas Gerais, Teófilo Otoni	M	IV
MZUSP	837	Brazil	São Paulo, Franca	M	II
MZUSP	2237	Brazil	Espírito Santo, Colatina	M	IV
MZUSP	1163	Brazil	São Paulo, Itararé	F	II
MZUSP	6584	Brazil	Rio de Janeiro, Angra dos Reis	M	III
MZUSP	455	Brazil	São Paulo, Bauru	?	IV
MZUSP	488	Brazil	São Paulo, Bauru	M	IV
MZUSP	1807	Brazil	São Paulo, Ubatuba	M	III
MZUSP	1161	Brazil	São Paulo, Itararé	F	IV
MZUSP	2468	Brazil	Paraná, Castro	M	III
MZUSP	2469	Brazil	Paraná, Castro	F	III
MZUSP	3918	Brazil	Goiás	?	IV
MZUSP	3917	Brazil	Goiás	?	III
NMW	1286	Brazil	São Paulo, Iguapé	?	III
NMW	2654/B2229	Brazil	Santa Catarina, Jaraguá do Sul	?	IV
NMW	1006	Paraguay	-	?	IV
NMW	4107	?	-	M	III
NMW	1704	Brazil	Rio de Janeiro, Teresópolis	?	IV
UFMG	4193	Brazil	Pará, Oriximiná	M	IV
UFMG	3936	Brazil	Minas Gerais, Abre Campo	?	IV
UFMG	4460	Brazil	Minas Gerais, Ouro Preto	M	IV
UFMG	7423	Brazil	Minas Gerais	?	IV
USNM	132511	Mexico	Veracruz, Perez	M	IV
USNM	100417	Mexico	Tabasco, Teapa	M	IV
USNM	051274	Nicaragua	Escondido River	M	III
USNM	172994	Venezuela	Montes de Sierra	F	III
USNM	077996	Mexico	Chiapas, Huehuetan	M	III
USNM	013070	Mexico	Oxaca, Tehuantepec	?	IV
USNM	051325	Nicaragua	Escondido River	F	IV
USNM	108504	Mexico	Yucatán, Puerto Morelos	F	I
USNM	065967	Mexico	Veracruz, Catemaco	F	IV
USNM	181265	Mexico	Campeche, Champoton	?	IV
USNM	244902	Guatemala	Petén, La Libertad	?	IV
USNM	244901	Guatemala	Petén, Chuntugui	M	IV
USNM	443577	Venezuela	Barinas, Altamira	M	II
USNM	310670	Panama	Darién, Tacarcuna	M	IV
USNM	443575	Venezuela	Zulia, El Rosario	F	III
USNM	443719	Venezuela	Táchira, San Cristóbal	M	IV
USNM	442899	Venezuela	Falcón, Mirimiri	F	IV
USNM	443485	Venezuela	Zulia, El Rosario	M	IV
USNM	374848	Venezuela	Bolívar, El Dorado	M	IV
USNM	406838	Venezuela	Amazonas, Puerto Ayacucho	F	IV
USNM	362305	Panama	Darién, Jaqué	F	IV
USNM	362308	Panama	Darién, Jaqué	F	IV
USNM	334554	Panama	Bocas del Toro	M	IV
USNM	256177	Panama	Canal Zone, Barro Colorado Island	M	IV
USNM	310673	Panama	Darién, Tacarcuna	F	IV
USNM	290885	Panama	Bocas del Toro	F	III
USNM	307041	Panama	Cerro Azul	F	IV
USNM	310671	Panama	Darién, Tacarcuna	M	IV
USNM	171081	Panama	Canal Zone, Gatún	M	IV
USNM	104546	Ecuador	Giza, Paramba	F	IV
USNM	104547	Ecuador	Giza, Paramba	M	IV
USNM	061203	Costa Rica	-	M	IV
USNM	012201	Costa Rica	Talamanca	F	IV
USNM	013775	Costa Rica	San José	?	IV
USNM	011375	Costa Rica	Talamanca	?	IV
AMNH - American Museum of Natural History, New York, USA
FMNH - Field Museum of Natural History, Chicago, USA
MCN - Museu de Ciências Naturais da Pontifícia Universidade Católica Minas, Belo Horizonte, Brazil
MN - Museu Nacional, Rio de Janeiro, Brazil
MNHN - Muséum National d'Histoire Naturelle, Paris, France
MZUSP - Museu de Zoologia da Universidade de São Paulo, São Paulo, Brazil
NMW - Naturhistorisches Museum Wien, Vienna, Austria
UFMG - Centro de Coleções Taxonômicas da Universidade Federal de Minas Gerais, Belo Horizonte, Brazil
USNM - Smithsonian National Museum of Natural History, Washington D.C., USA
