# Supplementary material for: Sex- and age-related morphological and functional differences in the skull of Eira barbara (Linnaeus, 1758) (Carnivora, Mustelidae)
Source: PeerJ. 2025 Jul 15;13:e19730. doi: 10.7717/peerj.19730 (PMC12273703; doi:10.7717/peerj.19730)
Supplement: Supplemental Information 2 [file peerj-13-19730-s002.xlsx]

## Sheet: Plan1
Perini & Sicuro, Sex- and age-related morphological and functional differences in the skull of Eira barbara (Linnaeus, 1758) (Carnivora, Mustelidae)
Supplemental Table 2 - Summary of statistic analyses of cranial morphometry in Eira barbara (Linnaeus 1758)
Descriptive statistics
Males (age classe IV)
	Valid N	Mean	Median	Minimum	Maximum	Lower	Upper	Std.Dev.	Skewness	Kurtosis	Coef.Var	Shapiro-Wilk's Test p-value
ZW	87	71.5743	72.39	57.83	82.16	68.45	74.5	4.73081	-0.352491	0.12029	0.0660965	0.24323
RWC	87	30.2937	30.2	24.75	34.27	29.3	31.56	1.7653	-0.505926	0.978704	0.0582727	0.155749
IOW	87	26.4603	26.44	20.77	32.72	24.89	27.73	2.33013	0.166117	0.463735	0.0880614	0.251165
POC	87	23.5401	23.56	19.98	27.47	22.49	24.71	1.65937	-0.051333	-0.509922	0.0704914	0.673194
BBC	87	48.9125	49	43.5	54.04	47.49	50.28	2.34366	0.091241	-0.036265	0.0479153	0.345099
MB	87	54.7264	54.6	47.82	62.1	53.32	56.46	2.76258	-0.008252	0.488243	0.0504798	0.311897
PW	87	37.1232	37.13	31.26	41.11	35.84	38.49	1.78399	-0.250445	0.382288	0.048056	0.711742
PL	87	52.2629	52.5	42.95	57.46	50.93	54.19	2.60848	-0.833042	1.31708	0.0499108	0.01511
BL	87	48.6395	48.75	43.86	53.09	47.28	49.81	1.84321	-0.033843	-0.144138	0.0378953	0.914953
TRL	87	31.8876	31.91	27.66	35.74	30.79	32.88	1.64115	-0.081313	0.026487	0.0514668	0.905313
PPW	87	14.777	14.79	12.56	17.67	14.08	15.35	0.997784	0.219402	0.128962	0.0675228	0.769379
TBL	87	21.32	21.27	17.67	23.7	20.47	22.16	1.22532	-0.234476	0.044056	0.0574727	0.554835
TBW	87	11.2051	11.21	8.74	13.77	10.82	11.7	0.837896	-0.200771	1.30397	0.0747781	0.129131
OCB	87	25.3846	25.21	22.03	28.86	24.5	26.19	1.39054	0.42684	0.20922	0.0547789	0.114524
OPL	87	32.3195	32.6	25.9	37.67	31.2	33.64	2.21964	-0.199522	0.129327	0.068678	0.715936
NCL	87	90.6338	90.6	78.21	99.91	88.4	93.43	4.20517	-0.51375	0.543717	0.0463974	0.195383
TMA	87	21.4838	21.07	17.87	27	20.16	22.91	1.89282	0.611725	-0.025921	0.0881048	0.024476
MMA	87	13.0925	13.01	10.32	15.3	12.45	13.96	1.14579	-0.358998	-0.191506	0.0875147	0.096717
JL	87	73.3082	73.52	62.6	80.9	71.21	75.74	3.64499	-0.530896	0.521838	0.0497215	0.139029
JLA	87	72.2617	72.32	62.39	79.29	69.94	74.22	3.3764	-0.337318	0.380387	0.0467246	0.23107
JHM1	87	14.6968	14.73	10.85	17.27	14.03	15.48	1.20035	-0.507933	0.640065	0.0816742	0.208734
TFL	87	76.9133	76.94	63.38	85.84	74.79	79.6405	4.23023	-0.695098	0.947221	0.055	0.021892
CBL	87	114.645	114.75	99.3997	125.03	111.911	117.78	4.52872	-0.472758	1.17529	0.0395021	0.116957
MFL	87	28.5404	28.83	22.87	35.34	26.8402	30.41	2.52051	-0.088882	-0.303113	0.0883139	0.654155
Females (age classe IV)
	Valid N	Mean	Median	Minimum	Maximum	Lower	Upper	Std.Dev.	Skewness	Kurtosis	Coef.Var	Shapiro-Wilk's Test p-value
ZW	95	64.0468	64.25	56.4	75.28	62.21	66.05	3.30588	0.170014	0.848036	0.0516167	0.395647
RWC	95	26.8573	26.87	24.23	30.48	25.93	27.68	1.36102	0.235289	-0.143491	0.0506761	0.524076
IOW	95	23.7854	23.61	19.88	28.84	22.58	24.91	1.65668	0.251049	0.003012	0.0696513	0.804132
POC	95	22.3948	22.37	19.6	26.32	21.28	23.44	1.43261	0.296984	-0.126515	0.0639705	0.37673
BBC	95	45.3122	45.32	40.79	51.04	43.92	46.53	1.8333	0.19453	0.204299	0.0404594	0.959238
MB	95	50.3393	50.34	44.42	56.81	48.47	52.02	2.42991	0.15479	-0.197107	0.0482706	0.837615
PW	95	34.4134	34.32	30.48	38.17	33.72	35.39	1.39743	-0.074669	0.250367	0.0406071	0.809687
PL	95	47.3459	47.55	40.84	53	45.55	48.4	2.25603	-0.0317	-0.017046	0.04765	0.665171
BL	95	46.2204	46.19	41.31	49.73	45.26	47.09	1.46754	-0.001122	0.861765	0.0317509	0.137567
TRL	95	29.4394	29.4	24.78	32.31	28.57	30.33	1.28567	-0.286358	0.870459	0.0436716	0.313281
PPW	95	13.6095	13.6	11.74	15.77	13.02	14.22	0.819301	-0.009702	-0.416378	0.0602007	0.895751
TBL	95	20.4014	20.42	17.59	23.3	19.59	21.14	1.10489	0.062554	-0.001989	0.0541576	0.969158
TBW	95	10.596	10.58	9.03	12.3	10.28	11.06	0.625149	-0.02333	0.284271	0.0589986	0.377585
OCB	95	23.6429	23.36	21.2	27.06	22.75	24.44	1.22483	0.404822	-0.417141	0.0518055	0.043244
OPL	95	29.1138	29.15	25.27	32.71	28.16	29.82	1.54294	0.140128	-0.007298	0.0529968	0.342545
NCL	95	82.8216	82.82	76.5	93.04	80.61	84.62	3.35339	0.47783	0.399319	0.0404893	0.064508
TMA	95	19.4526	19.48	14.53	24.92	17.96	20.82	1.96647	0.115801	-0.06588	0.10109	0.980383
MMA	95	11.8815	11.9	9.04	14.48	11.18	12.6	1.10011	-0.065355	0.079208	0.0925897	0.775059
JL	95	66.7004	66.74	59.64	73.11	65.01	68.32	2.64316	-0.134841	0.172698	0.0396273	0.653642
JLA	95	66.148	66.19	58.46	71.74	64.77	67.6	2.53858	-0.156631	0.311039	0.0383772	0.678746
JHM1	95	12.7807	12.77	10.67	15.53	12.12	13.33	0.914922	0.458709	0.141475	0.0715862	0.292336
TFL	95	69.781	69.5094	63.6397	77.69	67.57	71.59	3.10074	0.353562	-0.150103	0.0444353	0.207092
CBL	95	106.304	106.613	96.9958	114.047	104.054	108.45	3.36214	-0.254985	0.036509	0.0316275	0.843196
MFL	95	25.6159	25.9207	21.79	29.49	24.3241	26.81	1.72363	-0.120609	-0.467462	0.0672876	0.298009
Males (age classe III)
	Valid N	Mean	Median	Minimum	Maximum	Lower	Upper	Std.Dev.	Skewness	Kurtosis	Coef.Var	Shapiro-Wilk's Test p-value
ZW	19	64.06	64.55	58.28	71.14	60.21	67.7	4.00871	0.127599	-1.22147	0.0625775	0.37691
RWC	19	28.8395	28.62	24.98	32.36	27.81	30.54	1.80574	-0.106756	0.01058	0.0626135	0.954538
IOW	19	23.4916	23.04	20.48	29.01	21.72	25.22	2.26348	0.964977	0.41719	0.0963526	0.129871
POC	19	24.26	23.9	22.08	29.51	23.33	24.99	1.77264	1.54666	3.2767	0.0730685	0.016759
BBC	19	46.8205	46.92	42.72	51.25	45.42	47.85	2.3659	0.112227	-0.23741	0.0505312	0.707382
MB	19	52.0221	52.48	46.3	56.15	49.87	54.88	3.00356	-0.372789	-0.62957	0.0577362	0.304872
PW	19	36.3368	35.94	33.28	39.03	35.68	37.26	1.44247	0.045103	0.09407	0.0396971	0.620688
PL	19	49.8821	50.48	43.55	54.92	47.67	51.66	3.21455	-0.335579	-0.40608	0.0644429	0.737182
BL	19	47.0184	47.42	42.57	49.72	45.55	48.8	2.17147	-0.813133	-0.09984	0.0461834	0.104955
TRL	19	30.9126	31.16	27.34	33.95	29.37	32.44	1.89128	-0.11523	-0.99431	0.0611814	0.601678
PPW	19	14.4953	14.45	11.93	17.03	13.34	15.62	1.5069	-0.015145	-0.82614	0.103958	0.830589
TBL	19	20.7679	21.02	18.06	22.5	19.93	21.92	1.28738	-0.701407	-0.33767	0.0619888	0.231033
TBW	19	10.9805	11.06	9.78	13.31	10.5	11.35	0.769397	1.34299	3.79451	0.0700694	0.044873
OCB	19	24.9579	25.37	22.86	26.8	23.53	26.28	1.38685	-0.25305	-1.49807	0.0555677	0.055579
OPL	19	31.2784	31.11	26.83	35.22	30	32.41	2.0618	-0.067834	0.22893	0.0659177	0.967674
NCL	19	86.0205	86.34	77.25	93.77	82.18	89.71	4.46907	-0.31071	-0.49519	0.0519535	0.875017
TMA	19	19.758	19.35	16.13	24.64	17.64	21.86	2.47554	0.385007	-0.826527	0.125293	0.537563
MMA	19	12.2432	12.34	9.61	13.86	11.73	13.22	1.19455	-0.743049	-0.0484	0.0975683	0.228166
JL	19	70.5379	70.56	62.53	79.02	67.68	74.08	4.41633	-0.134642	-0.57748	0.0626093	0.66251
JLA	19	69.2321	69.42	59.57	76.5	66.38	72.84	4.50652	-0.626998	-0.10063	0.0650929	0.535663
JHM1	19	13.2516	13.42	11.69	15.6	12.43	13.85	0.99505	0.450867	0.18264	0.075089	0.709395
TFL	19	71.6409	73.1177	63.4302	80.52	68.0542	73.7167	4.09086	-0.172168	0.27114	0.0571023	0.420466
CBL	19	110.581	111.27	99.2787	118.13	106.999	115.94	5.62304	-0.533536	-0.54814	0.05085	0.251938
MFL	19	26.3866	26.5296	21.49	31.57	24.6	28.0674	2.69942	-0.111356	-0.35066	0.102303	0.909218
Females (age classe III)
	Valid N	Mean	Median	Minimum	Maximum	Lower	Upper	Std.Dev.	Skewness	Kurtosis	Coef.Var	Shapiro-Wilk's Test p-value
ZW	18	59.5928	59.63	53.01	65.5	57.47	61.75	2.98934	-0.08114	0.34485	0.0501627	0.994472
RWC	18	26.1161	26.525	24.44	27.79	25.24	26.87	1.00911	-0.31206	-1.05952	0.0386395	0.212995
IOW	18	22.1506	22.415	19.85	23.96	21.45	23.05	1.17477	-0.44364	-0.37688	0.0530356	0.51039
POC	18	22.8156	22.83	19.73	25.85	21.73	23.74	1.54899	-0.01197	-0.11647	0.0678915	0.99
BBC	18	44.6594	44.76	40.13	47.51	43.49	45.55	1.78157	-0.49598	1.39553	0.0398925	0.314202
MB	18	49.5783	49.29	47.72	52.59	48.33	50.8	1.52223	0.69859	-0.56821	0.0307036	0.125389
PW	18	33.7606	33.5	31.77	35.7	33.2	34.28	1.00641	0.33674	0.08343	0.0298103	0.526063
PL	18	46.7333	46.865	42.73	52.1	44.6	48.68	2.5229	0.33901	-0.35137	0.0539851	0.850571
BL	18	46.2556	46.03	42.45	49.68	45.24	47.61	1.9982	-0.1023	-0.57161	0.0431992	0.961714
TRL	18	29.3794	29.5	27.89	30.92	28.62	30.19	0.9102	-0.40867	-0.79102	0.0309809	0.166608
PPW	18	13.4328	13.615	10.75	14.83	12.97	14.03	0.957889	-1.22837	2.46307	0.0713097	0.128561
TBL	18	20.2606	20.24	18.22	22.47	19.69	20.92	1.04967	-0.08534	0.35902	0.0518084	0.974814
TBW	18	10.8433	10.865	9.97	12.33	10.38	11.02	0.576266	0.73142	1.38803	0.0531449	0.379363
OCB	18	22.9417	22.93	21.34	25.34	22.02	23.63	1.07226	0.51616	0.03793	0.0467385	0.799935
OPL	18	29.0806	29.23	26.42	30.96	28.25	30.18	1.28485	-0.54062	-0.43699	0.0441824	0.527184
NCL	18	81.4561	81.27	74.98	85.96	79.34	83.64	2.98261	-0.40536	-0.32237	0.0366161	0.736309
TMA	18	18.1402	17.885	13.46	22.48	17.08	19.6	1.94672	0.046952	1.77427	0.107315	0.176112
MMA	18	11.5528	11.965	9.81	13.34	10.56	12.11	1.06063	-0.40151	-0.82601	0.0918073	0.159453
JL	18	65.7667	65.405	61.6	70.61	64.45	67.37	2.34003	0.06803	-0.07669	0.0355807	0.976081
JLA	18	65.0844	65.24	61.13	69.38	63.16	67.2	2.48233	-0.21308	-0.86762	0.0381402	0.452192
JHM1	18	12.045	12	10.36	13.33	11.67	12.87	0.804204	-0.16462	-0.187	0.0667666	0.557636
TFL	18	67.6762	67.885	58.87	71.82	66.47	69.75	2.9424	-1.50876	3.84362	0.0434777	0.034862
CBL	18	106.014	105.325	98.22	113.29	103.977	109.42	3.75681	-0.05512	-0.05443	0.0354368	0.932348
MFL	18	23.903	24.1904	19.11	28.54	22.02	25.0484	2.32874	-0.03712	0.06082	0.0974247	0.97347
Males (age classe II)
	Valid N	Mean	Median	Minimum	Maximum	Lower	Upper	Std.Dev.	Skewness	Kurtosis	Coef.Var	Shapiro-Wilk's Test p-value
ZW	14	59.5243	58.535	54.77	65.67	57.22	61.35	3.28637	0.48621	-0.70136	0.0552105	0.598479
RWC	14	28.315	28.7	25.93	31.29	26.95	28.97	1.72677	0.298591	-0.94496	0.0609843	0.306617
IOW	14	22.4757	21.93	20.57	25.58	21.16	23.66	1.59289	0.809606	-0.45721	0.0708715	0.152969
POC	14	25.1279	24.49	22.9	28.29	24	26.29	1.68286	0.775772	-0.50443	0.0669716	0.149499
BBC	14	46.5779	45.78	44.25	51.09	45.26	48.38	2.01676	0.93385	0.17857	0.0432986	0.128839
MB	14	50.1807	50.215	46.76	53.63	48.51	52.07	2.19705	-0.045067	-1.40466	0.0437828	0.259917
PW	14	36.2107	36.265	33.32	40.13	33.9	37.7	2.18369	0.330304	-0.9332	0.060305	0.319837
PL	14	46.3536	46.93	41.96	51.59	43.78	47.96	2.97505	0.31295	-0.93396	0.0641817	0.365585
BL	14	45.4379	44.815	43.26	48.46	44.37	46.72	1.55743	0.49105	-0.78909	0.034276	0.431963
TRL	14	29.6171	29.55	27.74	32.77	28.58	29.97	1.39055	0.846538	0.59655	0.0469508	0.389459
PPW	14	15.0986	15.545	12.48	17.02	13.6	16.1	1.44385	-0.535136	-0.76358	0.0956281	0.247341
TBL	14	19.9536	20.145	18.06	21.66	18.98	20.8	1.06823	-0.31686	-0.92982	0.0535358	0.613414
TBW	14	11.0836	11.18	9.37	13.6	10.41	11.32	0.987994	0.90114	2.68483	0.0891402	0.211997
OCB	14	24.9329	24.85	23.1	27.27	24.14	25.41	1.10743	0.478743	0.27522	0.0444162	0.969166
OPL	14	29.3836	28.79	26.94	32.46	28.57	31.06	1.71439	0.336557	-0.86748	0.0583451	0.433227
NCL	14	81.9764	82.28	77.14	86.05	79.49	85.08	3.10618	-0.14982	-1.5379	0.0378911	0.141691
TMA	14	18.0273	18.11	14.7918	21.13	16.92	18.8	1.61547	-0.11841	0.4749	0.0896127	0.971977
MMA	14	11.33	11.145	10.02	12.3	10.77	12.04	0.678936	-0.13649	-0.78224	0.0599237	0.360819
JL	14	65.6543	65.21	60.04	72.63	62.42	69.11	3.54106	0.439952	-0.35147	0.0539349	0.646471
JLA	14	65.0579	64.995	59.93	70.54	62.65	68.17	3.28995	-0.026008	-1.04501	0.0505695	0.739219
JHM1	14	12.7721	12.835	11.39	14.26	11.98	13.56	0.955616	0.129896	-1.23175	0.0748206	0.433979
TFL	14	68.9936	69.2348	59.4563	79.0744	65.4552	71.4969	4.94433	0.187034	0.49685	0.0716636	0.798996
CBL	14	105.046	104.355	98.47	111.22	102.04	108.438	3.93443	-0.030276	-1.07471	0.0374543	0.786385
MFL	14	23.8381	23.9549	21.68	26.1552	22.47	24.5434	1.38335	0.06341	-0.8136	0.0580311	0.794534
Females (age classe II)
	Valid N	Mean	Median	Minimum	Maximum	Lower	Upper	Std.Dev.	Skewness	Kurtosis	Coef.Var	Shapiro-Wilk's Test p-value
ZW	9	57.1889	56.62	53.23	61.2	55.17	59.55	2.61223	0.18137	-0.92753	0.0456773	0.795331
RWC	9	26.2522	25.99	24.54	27.88	25.34	27.48	1.31987	0.05648	-1.96428	0.0502767	0.194592
IOW	9	21.1	21	19.17	22.88	20.48	22.06	1.30977	-0.28713	-0.98071	0.0620745	0.641131
POC	9	24.3578	24.72	22.57	25.95	23.63	25.18	1.19331	-0.42312	-1.18442	0.048991	0.416816
BBC	9	44.6911	44.42	42.03	48.45	43.79	45.77	1.99243	0.45441	0.43827	0.0445822	0.748816
MB	9	47.9189	48.08	42.16	52.72	47.41	48.73	2.79526	-0.56203	2.65106	0.0583332	0.360647
PW	9	34.0911	33.66	32.33	37.02	32.58	34.63	1.78822	0.96932	-0.39901	0.0524542	0.062526
PL	9	43.1278	43.79	37.9	45.73	42.99	44.8	2.5331	-1.30722	1.24081	0.0587347	0.124047
BL	9	43.6722	43.08	40.44	46.21	42.56	45.46	1.94151	-0.10021	-0.87301	0.0444565	0.606129
TRL	9	28.4356	29.14	26.3	30.03	26.95	29.65	1.4783	-0.35986	-1.84513	0.0519877	0.135762
PPW	9	13.9078	14.02	12.41	15.75	12.82	14.7	1.16969	0.02966	-1.20637	0.084103	0.563807
TBL	9	19.3089	19.51	17.09	21.3	18.4	20.04	1.24896	-0.28149	0.11369	0.0646833	0.946728
TBW	9	10.57	10.6	9.61	11.71	10.34	10.7	0.573607	0.50767	1.82409	0.0542675	0.663138
OCB	9	23.3933	23.3	21.22	25.95	23.08	23.84	1.38561	0.24413	0.7206	0.0592312	0.798932
OPL	9	27.3622	27.13	23.84	30.47	26.53	27.87	1.93145	-0.05146	0.80171	0.0705882	0.642201
NCL	9	78.8411	79.54	74	83.1	75.26	82.63	3.61441	-0.02717	-1.75918	0.0458442	0.194273
TMA	9	16.7389	16.49	14.64	19.29	15.91	17.46	1.65918	0.349871	-0.781713	0.099121	0.511755
MMA	9	11.19	11	9.79	12.32	10.72	11.85	0.798264	-0.27935	-0.55167	0.0713373	0.577357
JL	9	62.43	62.66	55.83	66.23	60.65	64.79	3.41295	-0.72257	0.16085	0.0546685	0.371732
JLA	9	61.2956	60.67	55.26	65.49	59.82	63.19	3.13866	-0.48605	0.57015	0.0512053	0.563452
JHM1	9	11.9522	12.14	11.04	13.12	11.42	12.27	0.686363	0.17432	-0.64939	0.0574257	0.764997
TFL	9	66.9178	67.26	59.7238	74.4469	63.25	68.47	4.74539	0.07669	-0.54992	0.0709138	0.805164
CBL	9	100.315	100.38	91.4502	107.32	98.04	102.15	5.0433	-0.24103	-0.09745	0.0502748	0.866639
MFL	9	22.0736	21.1062	19.9844	24.9	20.42	24.0233	1.9358	0.39762	-1.85642	0.0876977	0.119945
Males (age classe I)
	Valid N	Mean	Median	Minimum	Maximum	Lower	Upper	Std.Dev.	Skewness	Kurtosis	Coef.Var	Shapiro-Wilk's Test p-value
ZW	13	53.5739	53.43	40	60.51	52.46	57.59	6.38961	-1.18775	0.87666	0.119267	0.03491
RWC	13	25.6492	25.92	21.51	27.97	25.12	27.04	2.00396	-0.97075	0.088688	0.0781294	0.14722
IOW	13	20.0346	20.22	16.25	24.18	18.55	21.13	2.19093	-0.0093	-0.043093	0.109357	0.972729
POC	13	25.1292	24.7	21.69	26.85	24.18	26.48	1.58664	-0.69652	-0.025498	0.0631392	0.089502
BBC	13	43.0885	43.25	34.71	48.94	41.34	45.37	4.1801	-0.65847	0.280017	0.0970121	0.451098
MB	13	44.6123	45.62	34.71	53.11	42.52	48.49	5.40195	-0.53697	-0.10533	0.121087	0.56055
PW	13	31.8454	32.17	28.5	33.79	30.93	32.82	1.54883	-0.71475	0.166803	0.0486359	0.509643
PL	13	39.4008	40.22	26.65	45.04	38.18	43.6	5.69942	-1.21337	0.926595	0.144653	0.046738
BL	13	38.8492	39.87	27.93	44.66	38.49	41.45	5.18255	-1.46285	1.63703	0.133402	0.007067
TRL	13	26.0985	26.6	19.29	30.06	24.86	28.47	3.06774	-1.03555	0.81221	0.117545	0.216171
PPW	13	14.0869	14.07	11.87	16.45	13.66	14.94	1.33207	-0.20264	-0.163753	0.0945608	0.831019
TBL	13	18.1739	18.29	13.97	20.8	18.05	19.1	2.02458	-1.1682	1.18276	0.111401	0.029595
TBW	13	9.72769	9.81	7.07	11.68	8.69	10.78	1.5512	-0.44081	-0.715	0.159462	0.371676
OCB	13	23.09	23.25	16.68	26.94	22.69	25.32	2.94992	-1.10019	0.989442	0.127757	0.079204
OPL	13	24.6115	25.46	18.26	28.74	23.2	26.77	3.28165	-0.84812	0.020051	0.133338	0.221536
NCL	13	71.8877	72.3	54.73	82.79	70.26	76.51	8.10291	-1.12863	1.04634	0.112716	0.076886
TMA	13	14.5	15.27	7.77	18.7	13.49	16.42	3.08903	-0.889304	0.648789	0.213037	0.394055
MMA	13	10.4608	11.21	6.81	11.97	10	11.27	1.58296	-1.63981	1.83941	0.151323	0.001
JL	13	55.1039	56.58	41.06	63.72	50.73	60.58	7.18775	-0.80491	-0.220886	0.13044	0.210478
JLA	13	54.44	56.36	39.67	64.14	50.46	60.11	7.78947	-0.72768	-0.167311	0.143084	0.24753
JHM1	13	12.6769	12.9	8.65	15.19	12.41	13.56	1.92756	-1.03232	0.97218	0.152053	0.070725
TFL	13	63.946	63.23	46.5	79.5049	60.1749	71.5055	9.70199	-0.35878	-0.13255	0.151721	0.562231
CBL	13	91.0571	90.9599	65.2	109.451	89.2799	99.1719	12.9375	-1.00221	0.813485	0.142081	0.088954
MFL	13	19.0031	18.8836	12.42	23.3172	16.6118	22.5994	3.71253	-0.55327	-0.673087	0.195364	0.211401
Females (age classe I)
	Valid N	Mean	Median	Minimum	Maximum	Lower	Upper	Std.Dev.	Skewness	Kurtosis	Coef.Var	Shapiro-Wilk's Test p-value
ZW	4	50.9775	52.135	45.55	54.09	48.105	53.85	3.92328	-1.23114	0.70537	0.0769609	0.32168
RWC	4	23.4425	24.665	19.44	25	21.935	24.95	2.67988	-1.94957	3.81944	0.114317	0.013509
IOW	4	18.8325	19.13	17.11	19.96	17.9	19.765	1.26524	-1.07931	0.43805	0.0671837	0.552324
POC	4	23.5025	24.135	20.19	25.55	21.965	25.04	2.32931	-1.4066	2.24964	0.0991091	0.402927
BBC	4	41.2875	42.05	38.44	42.61	40.17	42.405	1.92051	-1.86212	3.56287	0.0465155	0.056516
MB	4	42.8925	43.425	40.42	44.3	41.77	44.015	1.71731	-1.54371	2.51647	0.0400376	0.282363
PW	4	28.93	29.24	26.1	31.14	26.805	31.055	2.52131	-0.25975	-4.47766	0.0871521	0.244653
PL	4	36.9175	37.295	32.66	40.42	34.62	39.215	3.25071	-0.6393	0.84347	0.0880533	0.896287
BL	4	38.355	39.485	34.1	40.35	36.385	40.325	2.94207	-1.61543	2.42555	0.0767062	0.107814
TRL	4	24.295	24.92	21.7	25.64	23.145	25.445	1.78345	-1.66237	2.79592	0.0734082	0.173039
PPW	4	12.7175	12.83	11.36	13.85	11.935	13.5	1.05759	-0.55071	0.02953	0.0831601	0.929074
TBL	4	17.695	17.6	17.5	18.08	17.525	17.865	0.264134	1.68268	2.8419	0.014927	0.152304
TBW	4	9.4975	9.245	8.95	10.55	9.005	9.99	0.731089	1.56575	2.29423	0.076977	0.197943
OCB	4	22.9725	23.41	21.4	23.67	22.28	23.665	1.07503	-1.72651	2.91144	0.0467964	0.069372
OPL	4	22.9725	23.715	18.68	25.78	21.055	24.89	3.03165	-1.33465	2.39418	0.131969	0.418405
NCL	4	68.975	69.465	61.12	75.85	65.035	72.915	6.05468	-0.47665	1.48654	0.0877807	0.801958
TMA	4	15.9175	14.175	12.02	23.3	12.485	19.35	5.12399	1.57029	2.35467	0.321909	0.21141
MMA	4	10.015	10.03	9.25	10.75	9.44	10.59	0.694238	-0.07218	-3.65659	0.0693198	0.636152
JL	4	51.9925	53.05	45.94	55.93	48.765	55.22	4.42103	-1.11701	0.65718	0.085032	0.546414
JLA	4	51.4375	51.95	46.89	54.96	48.725	54.15	3.53446	-0.66621	-0.78476	0.0687137	0.79997
JHM1	4	11.43	12.195	8.7	12.63	10.33	12.53	1.84154	-1.86486	3.51296	0.161115	0.046879
TFL	4	64.9376	62.8426	59.3616	74.7034	60.5034	69.3717	6.78499	1.54017	2.51239	0.104485	0.285859
CBL	4	87.6791	89.055	82.3664	90.24	85.6534	89.7048	3.58679	-1.84689	3.56044	0.0409081	0.05773
MFL	4	17.2818	17.2578	16.5815	18.03	16.592	17.9715	0.797928	0.01796	-5.88945	0.0461716	0.059516
Inferential Statistics: Sexual dimorphism in age groups
Age Class IV
t-test	Mean Male-IV	Mean Female-IV	t-value	df	p-level	Valid N Male-IV	Valid N Female-IV
ZW	71.5743	64.0468	12.5258	180	1e-06	87	95	***
RWC	30.2937	26.8573	14.776	180	1e-06	87	95	***
IOW	26.4603	23.7854	8.98242	180	1e-06	87	95	***
POC	23.5401	22.3948	4.995	180	1e-06	87	95	***
BBC	48.9125	45.3122	11.5935	180	1e-06	87	95	***
MB	54.7264	50.3393	11.3965	180	1e-06	87	95	***
PW	37.1232	34.4134	11.4573	180	1e-06	87	95	***
PL	52.2629	47.3459	13.6312	180	1e-06	87	95	***
BL	48.6395	46.2204	9.83428	180	1e-06	87	95	***
TRL	31.8876	29.4394	11.2515	180	1e-06	87	95	***
PPW	14.777	13.6095	8.65591	180	1e-06	87	95	***
TBL	21.32	20.4014	5.31839	180	1e-06	87	95	***
TBW	11.2051	10.596	5.58777	180	1e-06	87	95	***
OCB	25.3846	23.6429	8.98244	180	1e-06	87	95	***
OPL	32.3195	29.1138	11.3903	180	1e-06	87	95	***
NCL	90.6338	82.8216	13.9114	180	1e-06	87	95	***
TMA	21.4838	19.4526	7.08605	180	1e-06	87	95	***
MMA	13.0925	11.8815	7.27267	180	1e-06	87	95	***
JL	73.3082	66.7004	14.0839	180	1e-06	87	95	***
JLA	72.2617	66.148	13.8788	180	1e-06	87	95	***
JHM1	14.6968	12.7807	12.1706	180	1e-06	87	95	***
TFL	76.9133	69.781	13.0472	180	1e-06	87	95	***
CBL	114.645	106.304	14.1841	180	1e-06	87	95	***
MFL	28.5404	25.6159	9.20202	180	1e-06	87	95	***
Age Class III
t-test	Mean Male-III	Mean Female-III	t-value	df	p-level	Valid N Male-III	Valid N Female-III
ZW	64.06	59.5928	3.82543	35	0.000516	19	18	***
RWC	28.8395	26.1161	5.61867	35	1e-05	19	18	***
IOW	23.4916	22.1506	2.2426	35	0.031358	19	18	*
POC	24.26	22.8156	2.63318	35	0.012507	19	18	**
BBC	46.8205	44.6594	3.12504	35	0.00564	19	18	**
MB	52.0221	49.5783	3.09436	35	0.00865	19	18	**
PW	36.3368	33.7606	6.267	35	1e-05	19	18	***
PL	49.8821	46.7333	3.30189	35	0.01	19	18	**
BL	47.0184	46.2556	1.1102	35	0.274484	19	18	ns
TRL	30.9126	29.3794	3.11311	35	0.00678	19	18	*
PPW	14.4953	13.4328	2.54304	35	0.015565	19	18	**
TBL	20.7679	20.2606	1.30946	35	0.198909	19	18	ns
TBW	10.9805	10.8433	0.611185	35	0.545027	19	18	ns
OCB	24.9579	22.9417	4.92744	35	0.0001	19	18	***
OPL	31.2784	29.0806	3.86561	35	0.00066	19	18	***
NCL	86.0205	81.4561	3.63273	35	0.00089	19	18	***
TMA	19.758	18.1402	2.20132	35	0.034399	19	18	*
MMA	12.2432	11.5528	1.85503	35	0.07203	19	18	ns
JL	70.5379	65.7667	4.072	35	0.001	19	18	***
JLA	69.2321	65.0844	3.43999	35	0.001	19	18	***
JHM1	13.2516	12.045	4.04276	35	0.001	19	18	***
TFL	71.6409	67.6762	3.36752	35	0.01	19	18	**
CBL	110.581	106.014	2.88754	35	0.006615	19	18	**
MFL	26.3866	23.903	2.98909	35	0.005091	19	18	**
Age Class II
t-test	Rank Sum	Rank Sum	U	Z	p-level	Valid N	Valid N
ZW	193	83	38	1.57485	0.124483	14	9	ns
RWC	207	69	24	2.45738	0.012974	14	9	**
IOW	196	80	35	1.76383	0.083188	14	9	ns
POC	180	96	51	0.755929	0.476707	14	9	ns
BBC	200	76	31	2.01631	0.045585	14	9	ns
MB	199	77	32	1.95282	0.053376	14	9	ns
PW	202	74	29	2.14233	0.032746	14	9	*
PL	201	75	30	2.0788	0.038745	14	9	*
BL	202	74	29	2.1418	0.032746	14	9	*
TRL	190	86	41	1.38587	0.179361	14	9	ns
PPW	199.5	76.5	31.5	1.9848	0.045585	14	9	*
TBL	187	89	44	1.19718	0.249567	14	9	ns
TBW	190	86	41	1.38621	0.179361	14	9	ns
OCB	209	67	22	2.58276	0.008568	14	9	**
OPL	206	70	25	2.39437	0.0158	14	9	*
NCL	201	75	30	2.07932	0.038745	14	9	*
TMA	195	81	36	1.70126	0.095574	14	9	ns
MMA	177	99	54	0.566947	0.599511	14	9	ns
JL	196	80	35	1.76427	0.083188	14	9	ns
JLA	207	69	24	2.45677	0.012974	14	9	**
JHM1	195.5	80.5	35.5	1.73277	0.083188	14	9	ns
TFL	180	96	51	0.755929	0.476707	14	9	ns
CBL	203	73	28	2.20479	0.027536	14	9	*
MFL	201	75	30	2.0788	0.038745	14	9	*
Age Class I
Mann-Whitney U Test
	Rank Sum	Rank Sum	U	Z	p-level	Valid N	Valid N
ZW	125	28	18	0.905822	0.411765	13	4	ns
RWC	134	19	9	1.92487	0.059664	13	4	ns
IOW	128	25	15	1.24551	0.245378	13	4	ns
POC	129	24	14	1.35873	0.201681	13	4	ns
BBC	128	25	15	1.24551	0.245378	13	4	ns
MB	124	29	19	0.792594	0.477311	13	4	ns
PW	134	19	9	1.92487	0.059664	13	4	ns
PL	128	25	15	1.24551	0.245378	13	4	ns
BL	123	30	20	0.679366	0.548739	13	4	ns
TRL	130	23	13	1.47196	0.163025	13	4	ns
PPW	133	20	10	1.81164	0.078992	13	4	ns
TBL	133	20	10	1.81164	0.078992	13	4	ns
TBW	121	32	22	0.452911	0.703361	13	4	ns
OCB	119	34	24	0.226455	0.870588	13	4	ns
OPL	125	28	18	0.905822	0.411765	13	4	ns
NCL	127	26	16	1.13228	0.295798	13	4	ns
TMA	125	28	18	0.905822	0.411765	13	4	ns
MMA	131	22	12	1.58616	0.130252	13	4	ns
JL	126	27	17	1.01905	0.35042	13	4	ns
JLA	125	28	18	0.905822	0.411765	13	4	ns
JHM1	130	23	13	1.47196	0.163025	13	4	ns
TFL	117	36	26	0	1	13	4	ns
CBL	130	23	13	1.47196	0.163025	13	4	ns
MFL	129	24	14	1.35873	0.201681	13	4	ns
Principal Component Analysis: Sexual dimorphism in age groups
Eingenvalues
Variable loadings
	PC 1	PC 2
ZW	-0.93469	0.030416
RWC	-0.89461	-0.228137
IOW	-0.8566	-0.069481
POC	-0.16861	-0.86176
BBC	-0.90575	-0.24924
MB	-0.9431	-0.020394
PW	-0.84425	-0.215922
PL	-0.94495	0.16242
BL	-0.87804	0.235457
PPW	-0.59147	-0.549325
TBL	-0.72882	0.147304
TBW	-0.59325	-0.134502
OCB	-0.73219	-0.214214
OPL	-0.88934	0.129727
NCL	-0.96086	0.087339
TMA	-0.83208	0.159988
MMA	-0.77581	-0.00887
JL	-0.96076	0.159259
JLA	-0.96233	0.173289
JHM1	-0.85067	-0.159743
TFL	-0.88881	0.062207
CBL	-0.9659	0.15767
MFL	-0.8972	0.205897
Eigenvalue	16.4008	0.713933
Total variance	1.58101	0.0681513
Cumulative	71.3079	0.781818
Discriminant Function Analysis: Sexual dimorphism in age groups
Discriminant Function Analysis Summary
Wilks' Lambda: ,01989 approx. F (168,1549)=7,2621 p<0,0000 Exclude condition: v6>108
	Wilks' Lambda	Partial	F-remove	p-level	Toler.	1-Toler.
ZW	0.0278746	0.738574	11.5796	1e-08	0.150756	0.849244
RWC	0.0230116	0.894656	3.85206	0.000554461	0.188055	0.811946
IOW	0.0236823	0.869318	4.91785	0.0001	0.27315	0.72685
POC	0.0271539	0.758178	10.4343	1e-08	0.509756	0.490244
BBC	0.0212707	0.967878	1.08571	0.373203	0.149187	0.850813
MB	0.0207498	0.992175	0.258002	0.9692	0.172331	0.827669
PW	0.0244136	0.843278	6.07991	1e-05	0.287107	0.712893
PL	0.0213055	0.966299	1.14094	0.338301	0.140873	0.859127
BL	0.0215547	0.955127	1.53695	0.155711	0.145384	0.854616
PPW	0.0224418	0.917371	2.94663	0.00564997	0.586338	0.413662
TBL	0.0212009	0.971064	0.97481	0.450321	0.457803	0.542196
TBW	0.0210773	0.976758	0.778448	0.605971	0.603621	0.396379
OCB	0.0225098	0.914601	3.05462	0.01	0.434809	0.565191
OPL	0.0217174	0.94797	1.79556	0.0890677	0.222809	0.777191
NCL	0.0233564	0.881449	4.39991	0.000132573	0.101727	0.898273
TMA	0.0210501	0.97802	0.735207	0.642304	0.4295	0.5705
MMA	0.0213531	0.964143	1.21668	0.294354	0.505086	0.494914
JL	0.0215018	0.957476	1.45293	0.185254	0.0495169	0.950483
JLA	0.0214614	0.959279	1.38871	0.21093	0.0514009	0.948599
JHM1	0.0240471	0.85613	5.49752	7.39809e-06	0.280654	0.719346
TFL	0.0292098	0.704813	13.7012	1e-08	0.120915	0.879085
CBL	0.0231837	0.888013	4.12558	0.001	0.0311265	0.968874
MFL	0.0210778	0.976736	0.779201	0.605342	0.232899	0.767101
Squared Mahalanobis Distances
Exclude condition: v6>108
	Male-IV	Female-IV	Male-III	Female-III	Male-II	Female-II	Male-I	Female-I
Male-IV	0	5.81292	9.75842	13.0964	29.8193	25.8648	82.025	96.1731
Female-IV	5.81292	0	11.7859	5.34114	30.6489	20.995	77.3603	86.2933
Male-III	9.75842	11.7859	0	8.62259	11.2995	10.8004	63.8484	83.2838
Female-III	13.0964	5.34114	8.62259	0	24.0955	14.6311	75.9043	87.8179
Male-II	29.8193	30.6489	11.2995	24.0955	0	6.12593	37.9559	58.2114
Female-II	25.8648	20.995	10.8004	14.6311	6.12593	0	32.0455	44.2122
Male-I	82.025	77.3603	63.8484	75.9043	37.9559	32.0455	0	9.59346
Female-I	96.1731	86.2933	83.2838	87.8179	58.2114	44.2122	9.59346	0
Squared Mahalanobis Distances
p-levels Exclude condition: v6>108
	Male-IV	Female-IV	Male-III	Female-III	Male-II	Female-II	Male-I	Female-I
Male-IV	-	0,00000001***	0,00000001***	0,00000001***	0,00000001***	0,00000001***	0,00000001***	0,00000001***
Female-IV	0,00000001***	-	0,00000001***	0,00001***	0,00000001***	0,00000001***	0,00000001***	0,00000001***
Male-III	0,00000001***	0,00000001***	-	0,00001***	0,000001***	0,001***	0,00000001***	0,00000001***
Female-III	0,00000001***	0,00001***	0,00001***	-	0,00000001***	0,000001***	0,00000001***	0,00000001***
Male-II	0,00000001***	0,00000001***	0,000001***	0,00000001***	-	0,1486 n.s.	0,00000001***	0,00000001***
Female-II	0,00000001***	0,00000001***	0,001***	0,000001***	0,1486 n.s.	-	0,00000001***	0,00000001***
Male-I	0,00000001***	0,00000001***	0,00000001***	0,00000001***	0,00000001***	0,00000001***	-	0,2796 n.s.
Female-I	0,00000001***	0,00000001***	0,00000001***	0,00000001***	0,00000001***	0,00000001***	0,2796 n.s.	-
